# Supplementary material
Source: Elsevier journal article supplement (https://www.sciencedirect.com/science/article/pii/S0211699521001405)
Supplement: mmc1 [file S0211699521001405:mmc1.pdf]

## Supplementary, Acute kidney injury and risk of cardiovascular outcomes

|                                           | Total cohort      |               | Subcohort with proteinuria measurements |               |
|-------------------------------------------|-------------------|---------------|-----------------------------------------|---------------|
|                                           | No AKI            | AKI           | No AKI                                  | AKI           |
| Patient admissions                        | 525,487           | 39,569        | 221,068                                 | 18,750        |
| Males (%)                                 | 242,481<br>(46.1) | 19,976 (50.5) | 107,874 (48.8)                          | 9,964 (53.1)  |
| Age (mean(SD))                            | 71.8 (11.5)       | 74.7 (11.0)   | 72.6 (10.9)                             | 74.4 (10.5)   |
| eGFR [ml/min/1.73 m <sup>2</sup> ]<br>(%) |                   |               |                                         |               |
| 90+                                       | 135,212<br>(25.7) | 8,800 (22.2)  | 50,650 (22.9)                           | 3,637 (19.4)  |
| 60-89                                     | 273,455<br>(52.0) | 17,368 (43.9) | 113,527 (51.4)                          | 8,065 (43.0)  |
| 30-59                                     | 105,120<br>(20.0) | 11,345 (28.7) | 50,351 (22.8)                           | 5,809 (31.0)  |
| 15-29                                     | 11,700 (2.2)      | 2,056 (5.2)   | 6,540 (3.0)                             | 1,239 (6.6)   |
| Hypertension (%)                          | 188,704<br>(35.9) | 19,112 (48.3) | 98,641 (44.6)                           | 10,466 (55.8) |
| Diabetes (%)                              | 85,308 (16.2)     | 9,811 (24.8)  | 62,933 (28.5)                           | 7,235 (38.6)  |
| CVD (%)                                   | 143,037<br>(27.2) | 12,915 (32.6) | 69,042 (31.2)                           | 6,458 (34.4)  |
| Ischemic heart disease<br>(%)             | 38,691 (7.4)      | 2,934 (7.4)   | 19,693 (8.9)                            | 1,593 (8.5)   |
| Heart failure (%)                         | 20,726 (3.9)      | 2,923 (7.4)   | 10,409 (4.7)                            | 1,523 (8.1)   |
| Stroke (%)                                | 29,644 (5.6)      | 2,330 (5.9)   | 14,458 (6.5)                            | 1,152 (6.1)   |
| Atrial fibrillation/flutter<br>(%)        | 50,388 (9.6)      | 4,907 (12.4)  | 24,240 (11.0)                           | 2,448 (13.1)  |
| COPD (%)                                  | 34,351 (6.5)      | 3,007 (7.6)   | 14,464 (6.5)                            | 1,384 (7.4)   |
| Cancer (%)                                | 10,730 (2.0)      | 1,223 (3.1)   | 4,221 (1.9)                             | 534 (2.8)     |
| Liver disease (%)                         | 751,71 (14.3)     | 6,278 (15.9)  | 28,204 (12.8)                           | 2,690 (14.3)  |
| Proteinuria (%)                           |                   |               |                                         |               |
| no                                        | 163,104<br>(31.0) | 10,598 (26.8) | 163,104 (73.8)                          | 10,598 (56.5) |
| yes                                       | 57,964 (11.0)     | 8,152 (20.6)  | 57,964 (26.2)                           | 8,152 (43.5)  |
| unknown                                   | 304,419<br>(57.9) | 20,819 (52.6) | 0 (0.0)                                 | 0 (0.0)       |
| Cholesterol (%)                           |                   |               |                                         |               |
| < 5 mmol/l                                | 257,162<br>(48.9) | 22,102 (55.9) | 132,284 (59.8)                          | 12,374 (66.0) |
| => 5 mmol/l                               | 197,210<br>(37.5) | 12,006 (30.3) | 78,222 (35.4)                           | 5,522 (29.5)  |
| unknown                                   | 71,115 (13.5)     | 5,461 (13.8)  | 10,562 (4.8)                            | 854 (4.6)     |

## Supplementary, Acute kidney injury and association with subsequent cardiovascular outcomes

|                                      |                   |                 |                |                 |
|--------------------------------------|-------------------|-----------------|----------------|-----------------|
| Anti-lipids                          | 184,890<br>(35.2) | 15,593 (39.4)   | 97,904 (44.3)  | 9,017 (48.1)    |
| Loop diuretics (%)                   | 79,890 (15.2)     | 11,690 (29.5)   | 37,509 (17.0)  | 5,763 (30.7)    |
| Non-loop diuretics (%)               | 143,004<br>(27.2) | 14,424 (36.5)   | 70,100 (31.7)  | 7,446 (39.7)    |
| Calcium channel<br>blockers (%)      | 113,552<br>(21.6) | 10,318 (26.1)   | 59,267 (26.8)  | 5,786 (30.9)    |
| Betablockers (%)                     | 112,694<br>(21.4) | 11,110 (28.1)   | 55,337 (25.0)  | 5,910 (31.5)    |
| RASi (%)                             | 200,459<br>(38.1) | 20,416 (51.6)   | 107,329 (48.6) | 11,361 (60.6)   |
| Acetylsalicylic acid (%)             | 2330 (0.4)        | 170 (0.4)       | 879 (0.4)      | 69 (0.4)        |
| NSAID (%)                            | 87,859 (16.7)     | 6,754 (17.1)    | 36,159 (16.4)  | 3,080 (16.4)    |
| Admission number (%)                 |                   |                 |                |                 |
| 1                                    | 368,737<br>(70.2) | 26,446 (66.8)   | 136,654 (61.8) | 11,236 (59.9)   |
| 2                                    | 110,146<br>(21.0) | 9,123 (23.1)    | 56,669 (25.6)  | 4,995 (26.6)    |
| 3-5                                  | 46,604 (8.9)      | 4,000 (10.1)    | 27,745 (12.6)  | 2,519 (13.4)    |
| Speciality (%)                       |                   |                 |                |                 |
| medical                              | 305,118<br>(58.1) | 235,02 (59.4)   | 135,787 (61.4) | 11,863 (63.3)   |
| surgical                             | 183,132<br>(34.8) | 124,19 (31.4)   | 73,258 (33.1)  | 5,492 (29.3)    |
| other                                | 37,237 (7.1)      | 3,648 (9.2)     | 12,023 (5.4)   | 1,395 (7.4)     |
| Length of stay (days)<br>median[IQR] | 2.0 [1.0, 5.0]    | 7.0 [3.0, 13.0] | 2.0 [1.0, 5.0] | 7.0 [3.0, 13.0] |

Table S1. Baseline characteristics of hospitalized adult patients stratified by AKI of total cohort and subcohort with proteinuria measurements. (AKI, acute kidney injury; COPD, chronic obstructive pulmonary disease; eGFR, estimated glomerular filtration rate; IQR, interquartile range; NSAID, non-steroidal anti-inflammatory drug; RASi, Renin-angiotensin-aldosterone-receptor-system inhibitor; SD, standard deviation).

Supplementary, Acute kidney injury and risk of cardiovascular outcomes

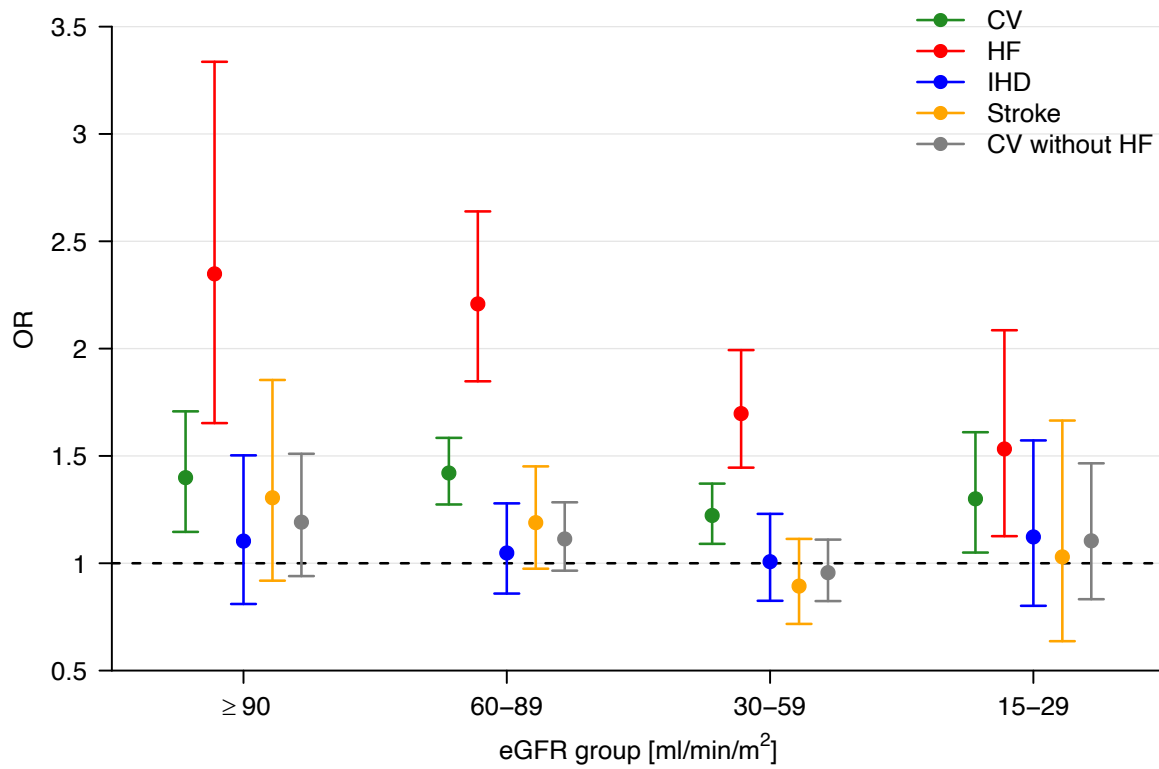

Figure S1. Adjustment for proteinuria. Plot shows one-year adjusted odds ratios of cardiovascular event/death, individual diagnosis of cardiovascular and cardiovascular without HF with 95% CI for AKI vs. no AKI in different intervals of baseline eGFR in the subcohort adjusted for proteinuria. (AKI, acute kidney injury; eGFR, estimated glomerular filtration rate; CV, cardiovascular; HF, heart failure; IHD, ischemic heart disease).

Supplementary, Acute kidney injury and association with subsequent cardiovascular outcomes

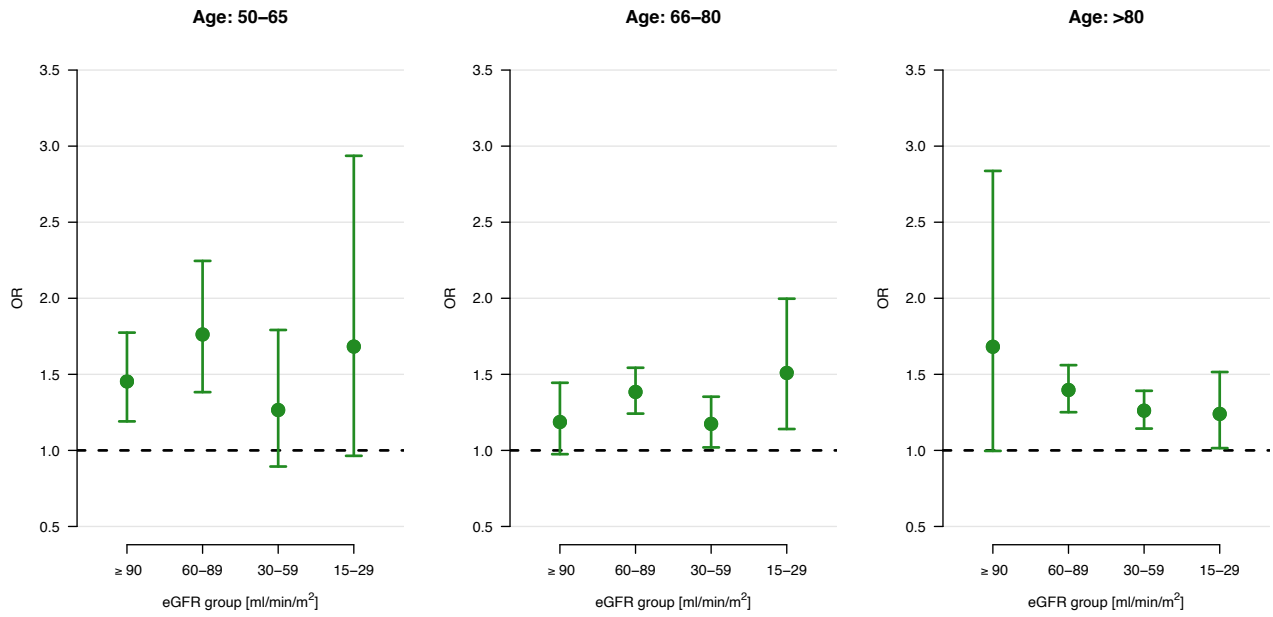

Figure S2. One-year adjusted odds ratios of cardiovascular event/death with 95% CI for AKI vs. no AKI in different intervals of eGFR in different age intervals. (AKI, acute kidney injury; eGFR, estimated glomerular filtration rate; CV, cardiovascular).

### Supplementary, Acute kidney injury and risk of cardiovascular outcomes

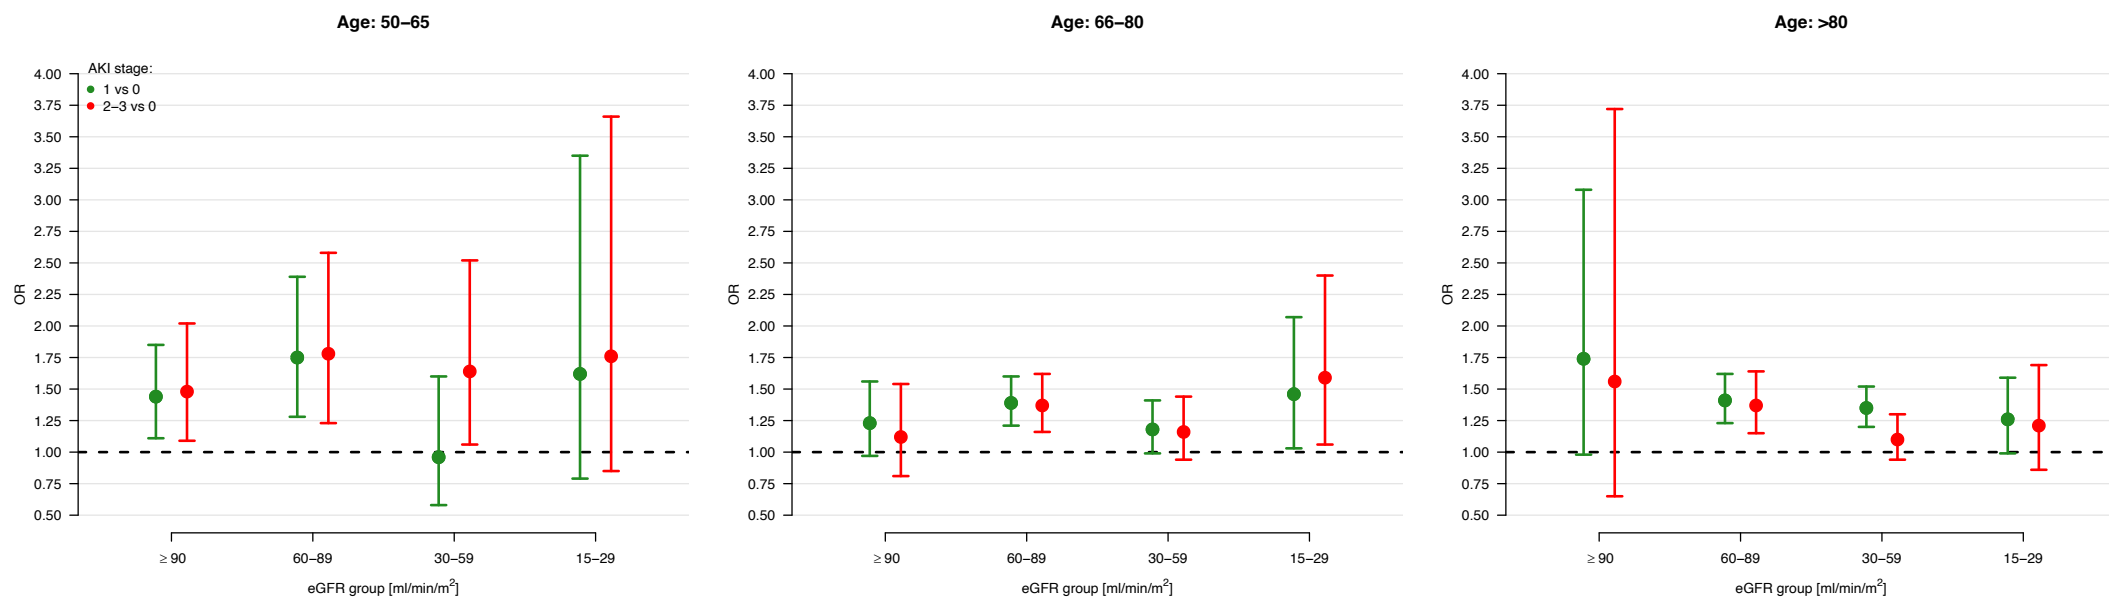

Figure S3. Strata of AKI-stages. Plots show one-year adjusted odds ratios of cardiovascular event/death with 95% CI for no AKI vs. AKI stage 1 and stage 2-3, respectively, at different intervals of eGFR in different age intervals. (AKI, acute kidney injury; eGFR, estimated glomerular filtration rate).

Supplementary, Acute kidney injury and risk of cardiovascular outcomes

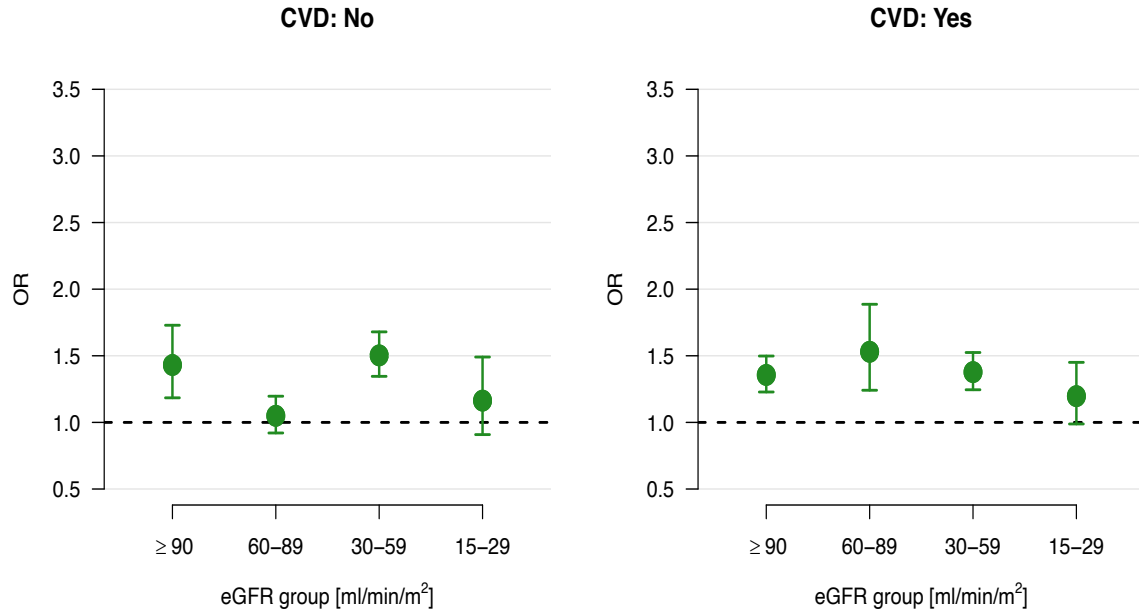

Figure S4. Interaction plot of prior cardiovascular disease. Plots show one-year adjusted odds ratios of cardiovascular event/death with 95% CI for AKI vs. no AKI in patients with or without prior cardiovascular disease in different intervals of eGFR. (AKI, acute kidney injury; CV, cardiovascular; eGFR, estimated glomerular filtration rate).

| eGFR-level [ml/min/1.73m <sup>2</sup> ] | Odds ratio | Lower CI | Upper CI |
|-----------------------------------------|------------|----------|----------|
| ≥ 90                                    | 2.12       | 1.39     | 3.24     |
| 60-89                                   | 3.16       | 1.64     | 6.08     |
| 30-59                                   | 3.63       | 1.85     | 7.15     |
| 15-29                                   | 6.13       | 1.39     | 27.12    |

Table S2. Sensitivity analysis of age group 18-49 years (not part of main study population). Results show one-year adjusted odds ratios of cardiovascular event/death with 95% CI for AKI vs. no AKI. (AKI, acute kidney injury; eGFR, estimated glomerular filtration rate).

### Supplementary, Acute kidney injury and risk of cardiovascular outcomes

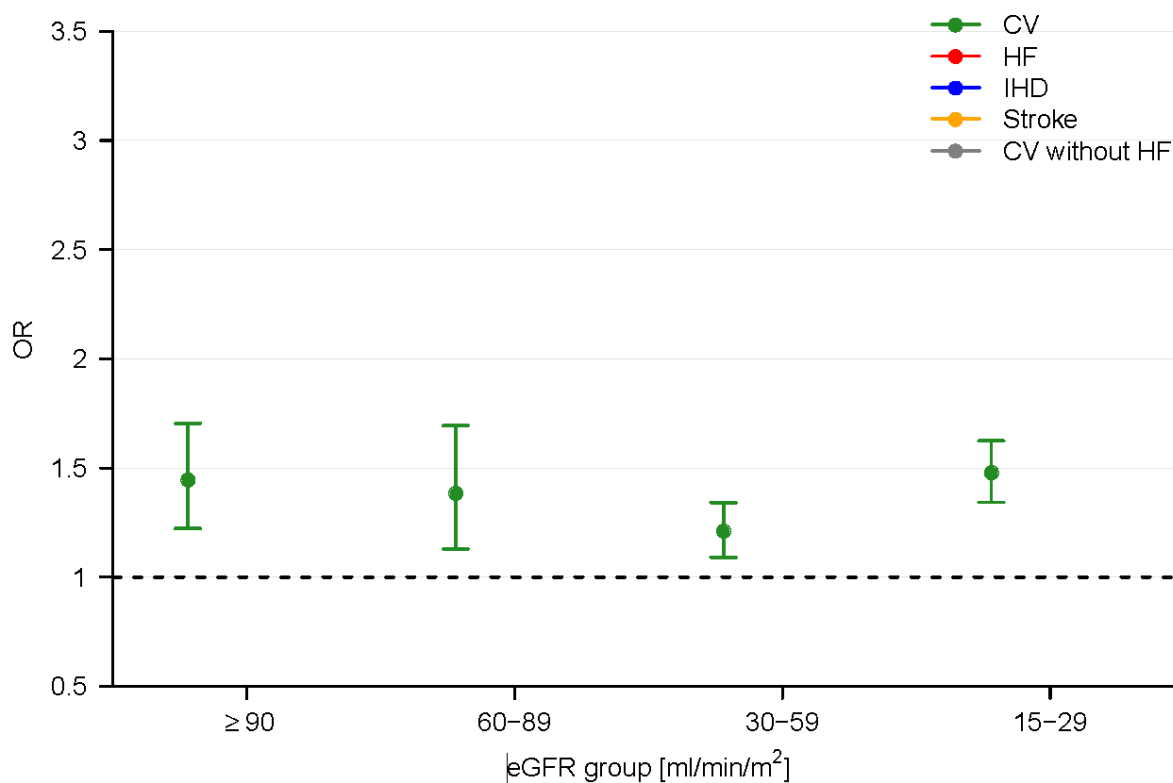

Figure S5. Sensitivity analysis of first-time admissions only. Plot show one-year adjusted odds ratios of cardiovascular event/death with 95% CI for AKI vs. no AKI in different intervals of eGFR. (AKI, acute kidney injury; CV, cardiovascular; eGFR, estimated glomerular filtration rate).

Supplementary, Acute kidney injury and association with subsequent cardiovascular outcomes

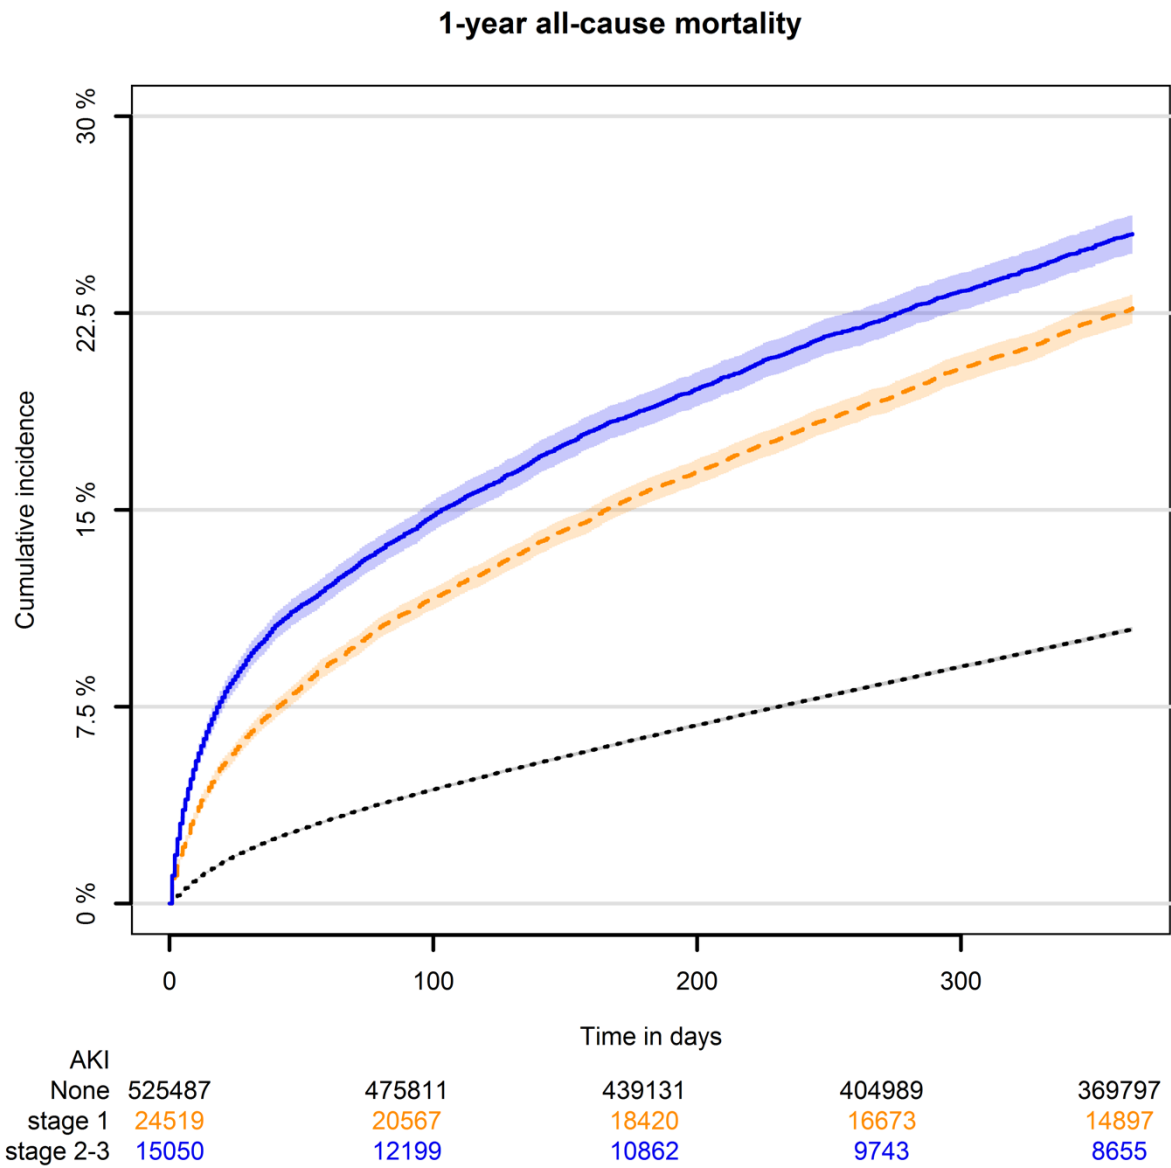

Figure S6. One-year cumulative incidence of all-cause mortality, stratified by AKI-stages, in discharged patients (AKI, acute kidney injury).



Supplementary, Acute kidney injury and risk of cardiovascular outcomes

| Drug                       | ATC codes               |
|----------------------------|-------------------------|
| ACE-inhibitors             | C09AA                   |
| Acetylic acid              | B01AC06, B01AC56, N02BA |
| Angiotensin-2 blockers     | C09CA                   |
| Anti-diabetic agents       | A10                     |
| Beta blockers              | C07AA, C07AB            |
| Calcium channel blockers   | C08CA                   |
| Anti-hyperlipidemic agents | C10                     |
| Loop diuretics             | C03EB                   |
| NSAID                      | M01A (except M01AX05)   |
| Thiazides                  | C03A, C03B, C03EA       |

Table S3. Anatomical Therapeutic Chemical Classification System (ATC) codes.

| Condition                             | ICD-10 codes                                 | NCSP codes     |
|---------------------------------------|----------------------------------------------|----------------|
| Atrial fibrillation/flutter           | DI48                                         |                |
| Cancer                                | DC00-41, DC45-96                             |                |
| Chronic obstructive pulmonary disease | DJ44                                         |                |
| Diabetes melitus                      | DE1                                          |                |
| End stage renal disease               | BJFD, DN185, DZ992                           |                |
| Heart failure                         | DI42, DI50, DJ81                             |                |
| Hypertention                          | DI10                                         |                |
| Ischemic heart disease                | DI20-25                                      | KFN            |
| Liver disease                         | DB15-19, DC22, DD684C, DK70-77, DI982, DZ944 |                |
| Renal transplantation                 | DT816, DT817, DZ940                          | KKAS           |
| Stroke                                | DI60-69, DG458, DG459                        | KAAL10, KAAL11 |

Table S4. 10th edition of the International Classification of Diseases (ICD-10) codes and Nordic Medico-Statistical Committee Classification of Surgical Procedures (NCSP) codes.
